# Supplementary material for: A literature review on the representativeness of randomized controlled trial samples and implications for the external validity of trial results
Source: Springer Nature journal article supplement (doi:10.1186/s13063-015-1023-4), 2015-11-03
Supplement: 13063_2015_1023_MOESM1_ESM.pdf [file 13063_2015_1023_MOESM1_ESM.pdf]

## Additional file 1

### Full OVID MEDLINE search

Ovid MEDLINE(R) In-Process & Other Non-Indexed Citations and Ovid MEDLINE(R) 1946 to Present

| #  | Searches                                                                                                               | Results | Search Type |
|----|------------------------------------------------------------------------------------------------------------------------|---------|-------------|
| 1  | exp Clinical Trials as Topic/                                                                                          | 294121  | Advanced    |
| 2  | (randomised or randomized or rct or rcts or clinical trial\$).ti,ab.                                                   | 551208  | Advanced    |
| 3  | or/1-2                                                                                                                 | 726830  | Advanced    |
| 4  | *"Reproducibility of Results"/                                                                                         | 1543    | Advanced    |
| 5  | (external valid\$ or externally valid\$).ti,ab.                                                                        | 4655    | Advanced    |
| 6  | (generalisab\$ or generalizab\$).ti,ab.                                                                                | 9630    | Advanced    |
| 7  | (real world or real life or real patient\$ or real practice\$ or real clinical\$ or real population\$).ti.             | 3327    | Advanced    |
| 8  | (actual world or actual life or actual patient\$ or actual practice\$ or actual clinical\$ or actual population\$).ti. | 167     | Advanced    |
| 9  | (transferable or transferability).ti,ab.                                                                               | 6743    | Advanced    |
| 10 | (unrepresentative or un-representative or "not representative" or "does not represent" or "do not represent").ti,ab.   | 5398    | Advanced    |
| 11 | (unreflective or un-reflective or "not reflective" or "does not reflect" or "do not reflect").ti,ab.                   | 4864    | Advanced    |
| 12 | directness.ti,ab.                                                                                                      | 173     | Advanced    |
| 13 | (applicab\$ or generaliz\$ or generalis\$).ti.                                                                         | 27827   | Advanced    |
| 14 | (reproducib\$ or relevan\$ or reality or realities or everyday or represent\$).ti.                                     | 80008   | Advanced    |
| 15 | or/4-14                                                                                                                | 142233  | Advanced    |

|    |                                                                                                                                                                                                                  |         |          |
|----|------------------------------------------------------------------------------------------------------------------------------------------------------------------------------------------------------------------|---------|----------|
| 16 | 3 and 15                                                                                                                                                                                                         | 7915    | Advanced |
| 17 | (aa or ad or ag or ai or de or dt or pd or pk or po or to or tu).fs.                                                                                                                                             | 5765649 | Advanced |
| 18 | exp Drug Therapy/                                                                                                                                                                                                | 1111794 | Advanced |
| 19 | exp Pharmaceutical Preparations/                                                                                                                                                                                 | 640602  | Advanced |
| 20 | exp Drug Interactions/                                                                                                                                                                                           | 145633  | Advanced |
| 21 | (drug or drugs or pharmaceutical\$1 or pharmacotherap\$ or pharmaco-therap\$ or chemotherap\$ or chemo-therap\$ or pharmacolog\$ or medicin\$ or medicat\$ or agent\$1 or dose\$1 or dosage\$1 or dosing).ti,ab. | 3221521 | Advanced |
| 22 | or/17-21                                                                                                                                                                                                         | 7275108 | Advanced |
| 23 | 16 and 22                                                                                                                                                                                                        | 4439    | Advanced |
| 24 | (news or editorial or letter or comment or case reports).pt.                                                                                                                                                     | 2948552 | Advanced |
| 25 | case report.ti.                                                                                                                                                                                                  | 154821  | Advanced |
| 26 | animals/ not humans/                                                                                                                                                                                             | 3939518 | Advanced |
| 27 | 23 not (24 or 25 or 26)                                                                                                                                                                                          | 4094    | Advanced |
| 28 | limit 27 to (english language and yr="2003 -Current")                                                                                                                                                            | 2792    | Advanced |
