# Supplementary material for: A literature review on the representativeness of randomized controlled trial samples and implications for the external validity of trial results
Source: Springer Nature journal article supplement (doi:10.1186/s13063-015-1023-4), 2015-11-03
Supplement: 13063_2015_1023_MOESM2_ESM.pdf [file 13063_2015_1023_MOESM2_ESM.pdf]

**Additional file 2.** Summary of real-world and RCT data sources employed in included studies

| Study                      | Real-world sources                                                                               | RCT sources                                                                                                  |
|----------------------------|--------------------------------------------------------------------------------------------------|--------------------------------------------------------------------------------------------------------------|
| <b>Cardiology</b>          |                                                                                                  |                                                                                                              |
| Badano et al, 2003 [15]    | Inpatients or outpatients with HF included in eight published epidemiological studies            | Patients enrolled in 27 published RCTs cited in HF clinical guidelines                                       |
| Bahit et al, 2003 [16]     | TIMI9 registry patients with STEMI not eligible for TIMI9B trial inclusion                       | TIMI9B-enrolled patients with STEMI; eligibility criteria from TIMI9B                                        |
| Björklund et al, 2004 [17] | Patients with MI included in a Swedish register of cardiac intensive care not enrolled in an RCT | Patients with STEMI enrolled in a double-blind RCT                                                           |
| Bosch et al, 2008 [19]     | Patients with NSTEMI included in a prospective observational study                               | Eligibility criteria from RCTs on the efficacy of intravenous antithrombotic therapy in patients with NSTEMI |
| Collet et al, 2003 [53]    | Patients with UA/NSTEMI included in an ischemic coronary                                         | Seven exclusion criteria from two thrombolysis RCTs                                                          |

| Study                       | Real-world sources                                                                                                  | RCT sources                                                                                                  |
|-----------------------------|---------------------------------------------------------------------------------------------------------------------|--------------------------------------------------------------------------------------------------------------|
| Costantino et al, 2009 [21] | syndrome registry<br>Patients referred to an HF outpatient clinic                                                   | Patients included in 16 HF RCTs identified by literature search; eligibility criteria from published HF RCTs |
| Dhruva et al, 2008 [22]     | Medicare beneficiaries                                                                                              | Patients included in studies forming the evidence base for cardiovascular technology assessments             |
| Ezekowitz et al, 2012 [24]  | Patients included in an acute HF registry (multicenter, retrospective, observational cohort) not enrolled in an RCT | Patients in a double-blind RCT in decompensated HF                                                           |
| Fortin et al, 2006 [55]     | Patients included in a representative database of primary care family doctors                                       | Eligibility criteria used in five RCTs in patients with hypertension listed in management guidelines         |
| Golomb et al, 2012 [27]     | Subjects included in a population-based observational study on the prevalence of arterial and venous disease        | Subjects enrolled in a double-blind RCT on use of statins in a primary-prevention sample                     |

| Study                             | Real-world sources                                                                                                                      | RCT sources                                                                                                                       |
|-----------------------------------|-----------------------------------------------------------------------------------------------------------------------------------------|-----------------------------------------------------------------------------------------------------------------------------------|
| Hutchinson-Jaffe et al, 2010 [29] | Patients hospitalized for ACS included in four registries (prospective, multicenter, observational studies) not participating in an RCT | RCT-enrolled patients included in the same four registries                                                                        |
| Koeth et al, 2009 [34]            | Patients with STEMI included in a prospective, multicenter, observational data pool                                                     | Eligibility criteria from RCTs in patients with STEMI                                                                             |
| Krumholz et al, 2003 [56]         | Patients with MI included in two registries who met eligibility criteria for an RCT on thrombolysis treatments                          | Patients enrolled in the thrombolysis RCT; eligibility criteria from the thrombolysis RCT                                         |
| Lenzen et al, 2005 [35]           | Patients with HF enrolled in the Euro Heart Survey                                                                                      | Eligibility criteria from three large RCTs studying effects of ACEIs, $\beta$ -blockers, and aldosterone antagonists on mortality |
| Masoudi et al, 2003 [36]          | National cohort of patients surviving hospitalization for HF                                                                            | Eligibility criteria from three RCTs in HF                                                                                        |

| <b>Study</b>               | <b>Real-world sources</b>                                                                                                       | <b>RCT sources</b>                                                                                                      |
|----------------------------|---------------------------------------------------------------------------------------------------------------------------------|-------------------------------------------------------------------------------------------------------------------------|
| Melloni et al, 2010 [37]   | General population with defined cardiovascular diseases (AHA Heart Disease and Stroke Statistics, 2008)                         | Patients enrolled in 156 RCTs cited by the AHA 2007 Women's Prevention Guidelines                                       |
| Steg et al, 2007 [40]      | Patients hospitalized with STEMI included in a registry                                                                         | RCT-enrolled patients included in the registry; eligibility criteria from three RCTs in coronary reperfusion therapy    |
| Steinberg et al, 2007 [62] | Patients with STEMI included in a registry                                                                                      | RCT-enrolled patients included in the same registry                                                                     |
| Uijen et al, 2007 [44]     | Patients with hypertension included in an Academic Network practice population                                                  | Patients in RCTs included in Dutch, British, and European hypertension guidelines; eligibility criteria from these RCTs |
| Wagner et al, 2011 [65]    | Patients who underwent CABG at medical centers actively participating in an RCT who were eligible but not enrolled in the study | Patients enrolled in a multicenter CABG surgery RCT                                                                     |

---

**Mental health**

| Study                     | Real-world sources                                                                                                               | RCT sources                                                                                                             |
|---------------------------|----------------------------------------------------------------------------------------------------------------------------------|-------------------------------------------------------------------------------------------------------------------------|
| Blanco et al, 2008 [18]   | Patients with MDD included in a large nationally representative sample of the US adult population                                | Common exclusion criteria from efficacy RCTs in MDD                                                                     |
| Goedhard et al, 2010 [26] | Inpatients with aggression in three long-stay wards at a mental health care institute                                            | Exclusion criteria from 31 RCTs studying management of aggression as identified by literature search                    |
| Hoertel et al, 2013 [28]  | Patients with DSM-IV bipolar depression or mania included in a large nationally representative sample of the US adult population | Seven most common exclusion criteria used in RCTs of bipolar depression and acute mania identified by literature review |
| Keitner et al, 2003 [32]  | Patients who inquired about participating in one of two antidepressant efficacy trials                                           | Eligibility criteria from two RCTs in MDD                                                                               |
| Khan et al, 2005 [33]     | General US population from the US Census Bureau, 1998                                                                            | Eligibility criteria from an open-label, multi-dose study in schizophrenia                                              |

| Study                       | Real-world sources                                                                          | RCT sources                                                                                                            |
|-----------------------------|---------------------------------------------------------------------------------------------|------------------------------------------------------------------------------------------------------------------------|
| Kushner et al, 2009 [57]    | Patients with MDD attending a depression clinic                                             | Patients with MDD enrolled in an antidepressant efficacy RCT                                                           |
| Rabinowitz et al, 2003 [59] | Patients enrolled in an epidemiological study of patients with first-episode psychosis      | Patients with first episode psychosis included in a large multinational RCT; exclusion criteria used in the same trial |
| Riedel et al, 2005 [60]     | Patients with schizophrenia matched with RCT patients for DSM-IV diagnosis, gender, and age | Inpatients with a diagnosis of DSM-IV schizophrenia who had participated in Phase III RCTs on neuroleptics             |
| Seemuller et al, 2010 [61]  | Hospitalized patients with MDD (DSM-IV)                                                     | Common exclusion criteria from 31 RCTs identified by a systematic literature review                                    |
| Storosum et al, 2004 [41]   | Hospitalized patients with manic or mixed episode of bipolar disorder                       | Twelve inclusion and exclusion criteria from nine RCTs included in an acute manic episode registration dossier         |
| Surman et al, 2010 [42]     | A community sample of adult patients with ADHD included                                     | Patients with ADHD participating in a double-blind RCT;                                                                |

| Study                        | Real-world sources                                                                     | RCT sources                                                                                                                                     |
|------------------------------|----------------------------------------------------------------------------------------|-------------------------------------------------------------------------------------------------------------------------------------------------|
|                              | in a naturalistic study                                                                | eligibility criteria from the same trial                                                                                                        |
| Talamo et al, 2008 [63]      | Inpatients prescribed antipsychotic, antimanic, or mood-stabilizing medicines          | Eligibility criteria commonly reported in 21 published RCTs identified by literature search                                                     |
| van der Lem et al, 2011 [64] | Treatment-seeking outpatients with MDD from a regional healthcare setting              | Common exclusion criteria used in antidepressant efficacy trials identified by literature review                                                |
| Wisniewski et al, 2009 [47]  | Outpatients enrolled in a prospective study in nonpsychotic MDD                        | Eligibility criteria used in placebo-controlled drug registration RCTs                                                                          |
| Zarin et al, 2005 [49]       | Patients with bipolar disorder or schizophrenia from a Practice Research Network study | Patients from two key published RCTs in bipolar I disorder or schizophrenia cited in practice guidelines; exclusion criteria used in the trials |
| Zetin and Hoepner, 2007 [50] | Patients with MDD or bipolar disorder from a single                                    | Eleven RCT exclusion criteria derived from 31                                                                                                   |

| Study                      | Real-world sources                                                                                  | RCT sources                                                                                                                         |
|----------------------------|-----------------------------------------------------------------------------------------------------|-------------------------------------------------------------------------------------------------------------------------------------|
| Zimmerman et al, 2004 [51] | outpatient fee-for-service private practice<br>Outpatients with MDD from a community-based practice | antidepressant efficacy studies<br>Exclusion criteria from 39 published antidepressant efficacy trials                              |
| <b>Oncology</b>            |                                                                                                     |                                                                                                                                     |
| Baquet et al, 2009 [52]    | Patients included in the Maryland Cancer Registry                                                   | Patients included in the Maryland Cancer Registry who were accrued into NCI-sponsored cancer treatment clinical trials in 1999–2002 |
| Clarey et al, 2012 [20]    | Patients with advanced NSCLC (stages IIIB and IV) presenting at a large teaching hospital           | Available eligibility criteria from nine Phase III NSCLC targeted therapy trials                                                    |
| Elting et al, 2006 [23]    | Patients with newly-diagnosed cancer presenting at a University Hospital cancer center              | Patients presenting at a University Hospital cancer center who participated in cancer treatment RCTs                                |



| <b>Study</b>             | <b>Real-world sources</b>                                                                                                | <b>RCT sources</b>                                                                                             |
|--------------------------|--------------------------------------------------------------------------------------------------------------------------|----------------------------------------------------------------------------------------------------------------|
| Filion et al, 2012 [54]  | Patients with invasive, nonmetastatic breast cancer included in the database at a specialized breast cancer center       | Exclusion criteria from nine breast cancer Phase II or III RCTs in the adjuvant and neoadjuvant settings       |
| Fraser et al, 2011 [25]  | Patients with breast cancer commencing adjuvant FE100C-D chemotherapy at a regional cancer center and a general hospital | Patients with breast cancer enrolled in an adjuvant chemotherapy RCT; eligibility criteria from the same trial |
| Jennens et al, 2006 [30] | Patients included in a malignant neoplasm database                                                                       | Patients with NSCLC or colorectal cancer enrolled in large RCTs                                                |
| Kalata et al, 2009 [31]  | Patients with stage II or III rectal cancer included in the Rostock Cancer Registry                                      | Patients with locally advanced rectal cancer enrolled in an RCT                                                |
| Mengis et al, 2003 [38]  | Patients with AML diagnosed at a University Hospital                                                                     | Patients with AML treated in five Phase III AML trials;                                                        |

| Study                           | Real-world sources                                                                                                                                                     | RCT sources                                                                                                                                                                                |
|---------------------------------|------------------------------------------------------------------------------------------------------------------------------------------------------------------------|--------------------------------------------------------------------------------------------------------------------------------------------------------------------------------------------|
| Mol et al, 2013 [58]            | <p>treated outside of a clinical trial protocol</p> <p>Patients with stage IV colorectal cancer receiving chemotherapy included in the Netherlands Cancer Registry</p> | <p>eligibility criteria from the trials</p> <p>Patients included in a large Dutch Phase III trial for the treatment of advanced colorectal cancer; eligibility criteria from the trial</p> |
| Somer et al, 2008 [39]          | <p>Treatment-naïve patients with advanced stage IV and ‘wet’ stage III NSCLC at the Fox Chase Cancer Center</p>                                                        | <p>Eligibility criteria for a unique NSCLC Phase III drug efficacy RCT</p>                                                                                                                 |
| Terschüren et al, 2010 [43]     | <p>Incident cases of HL and hgNHL in a large population-based epidemiological survey</p>                                                                               | <p>Patients included in six German multicenter HL RCTs or one multicenter hgNHL RCT; eligibility criteria from the trials</p>                                                              |
| van der Linden et al, 2013 [45] | <p>Patients with LA SCCHN included in a retrospective observational study</p>                                                                                          | <p>Patients with LA SCCHN included in a Phase III RCT</p>                                                                                                                                  |

| Study                            | Real-world sources                                                                                       | RCT sources                                                                                                     |
|----------------------------------|----------------------------------------------------------------------------------------------------------|-----------------------------------------------------------------------------------------------------------------|
| Vardy et al, 2009 [46]           | Patients with stage IIIB (pleural effusion) or stage IV NSCLC registered in a cancer center database     | Eligibility criteria for three Phase III chemotherapy RCTs                                                      |
| Yennurajalingam et al, 2013 [48] | Outpatients with advanced locally recurrent or metastatic cancer and fatigue at a palliative care clinic | Patients enrolled in five cancer-related fatigue clinical trials                                                |
| Yessaian et al, 2005 [66]        | Patients with cervical cancer from the NCI SEER database                                                 | Patients with primary cervical cancer included in eight Phase III RCTs conducted by large US cooperative groups |

ACEIs: angiotensin-converting enzyme inhibitors; ADHD: attention deficit hyperactivity disorder; AHA: American Heart Association; AML: acute myeloid leukemia;

CABG: coronary artery bypass graft; DSM-IV: Diagnostic and Statistical Manual of Mental Disorders; FE100C-D: six cycles of 5-flurouracil, epirubicin, and

cyclophosphamide followed by three cycles of docetaxel; HF: heart failure; HL: Hodgkin's lymphoma; hgNHL: high-grade nonHodgkin's lymphoma; LA SCCHN: locally-

advanced squamous cell carcinoma of the head and neck; MDD: major depressive disorder; MI: myocardial infarction; NSCLC: nonsmall cell lung cancer; NCI:

National Cancer Institute; NSTEMI: Non-ST-segment elevation acute coronary syndrome; NSTEMI: Non-ST-segment elevation myocardial infarction; RCT:

randomized controlled trial; SEER: Surveillance, Epidemiology, and End Results; STEMI: ST-elevation myocardial infarction; TIMI: Thrombolysis in Myocardial Infarction; UA: unstable angina.
